# Supplementary material for: A series of entangled coordination polymers assembled by a V-shaped bisimidazole ligand and various dicarboxylic acids: synthesis, characterization and luminescence properties
Source: Royal Society of Chemistry journal article supplement (doi:10.1039/c5ce00903k), 2015-01-01
Supplement: c5ce00903k1.pdf [file c5ce00903k1.pdf]

[Supporting information]

## **A series of entangled coordination polymers assembled by a V-shaped bisimidazole ligand and various dicarboxylic acids: synthesis, characterization and luminescent properties**

**Huadong Guo,<sup>a</sup> Yongnian Yan,<sup>a</sup> Nan Wang, Xianmin Guo,<sup>\*a</sup> Guoli Zheng<sup>\*b</sup> and Yanjuan Qi<sup>a</sup>**

<sup>a</sup> Department of Chemistry, Changchun Normal University, Changchun, 130032, P. R. China. Fax: +86-431-86168093; Tel: +86-431-86168210; E-mail: [xian\\_min@hotmail.com](mailto:xian_min@hotmail.com)

<sup>b</sup> Key Laboratory of Catalysis and Materials of the State Ethnic Affairs Commission & Ministry of Education, Hubei Province, South-Central University for Nationalities, Wuhan, 430074, P. R. China. E-mail: [zhengguoli2002@aliyun.com](mailto:zhengguoli2002@aliyun.com).

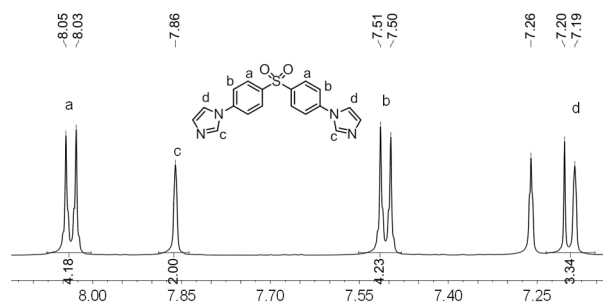

**Fig. S1.** The  $^1\text{H}$ NMR spectra of bips.

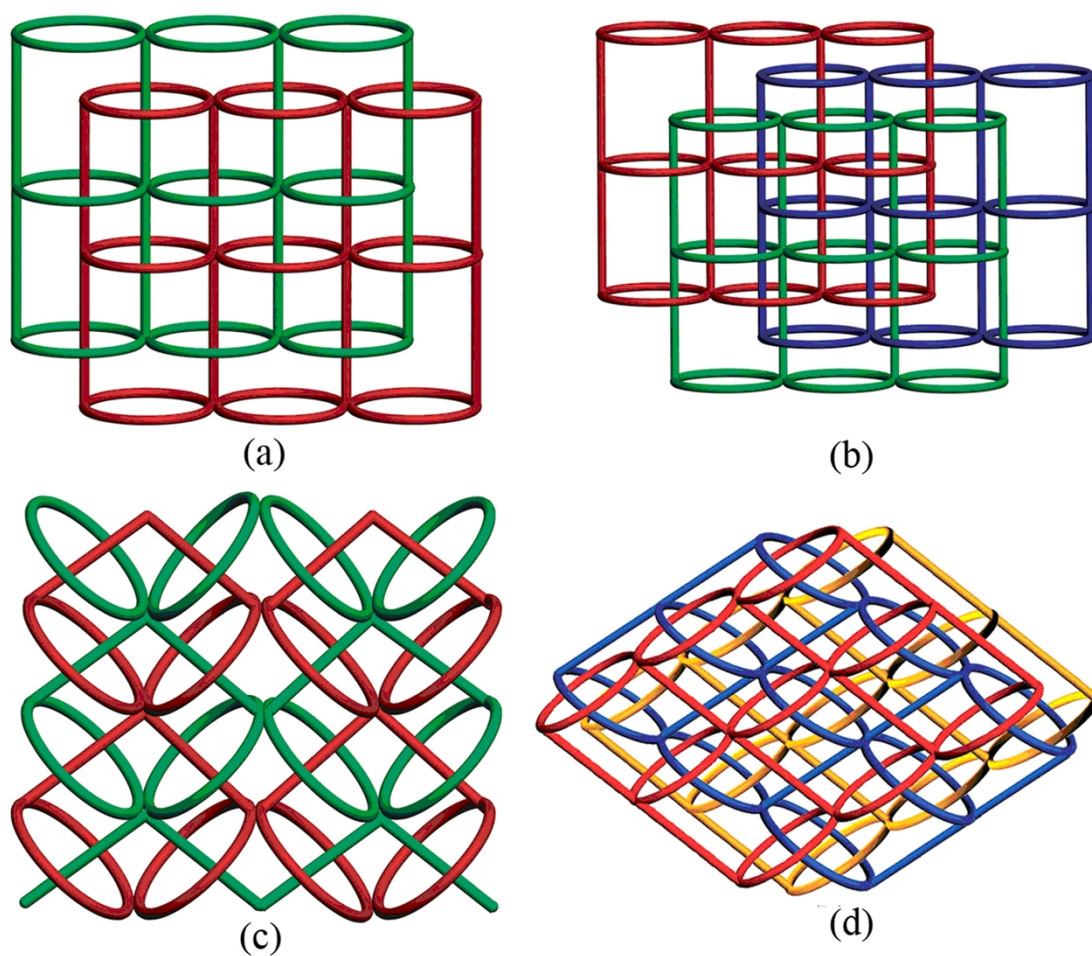

**Fig. S2.** Four examples of interpenetrated **sql** networks with different type of entanglements involving the 2-membered loops.

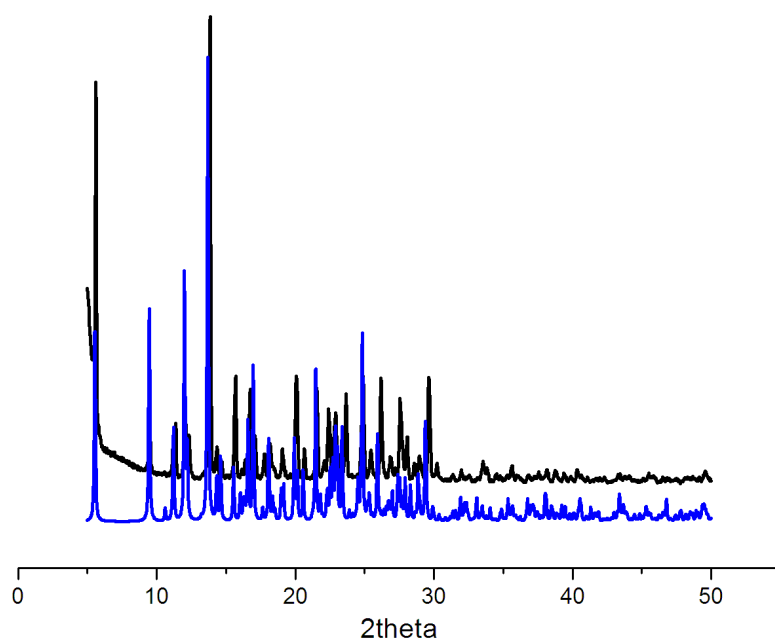

**Fig. S3.** The simulated(blue) and experimental (black) XRPD patterns for **1**.

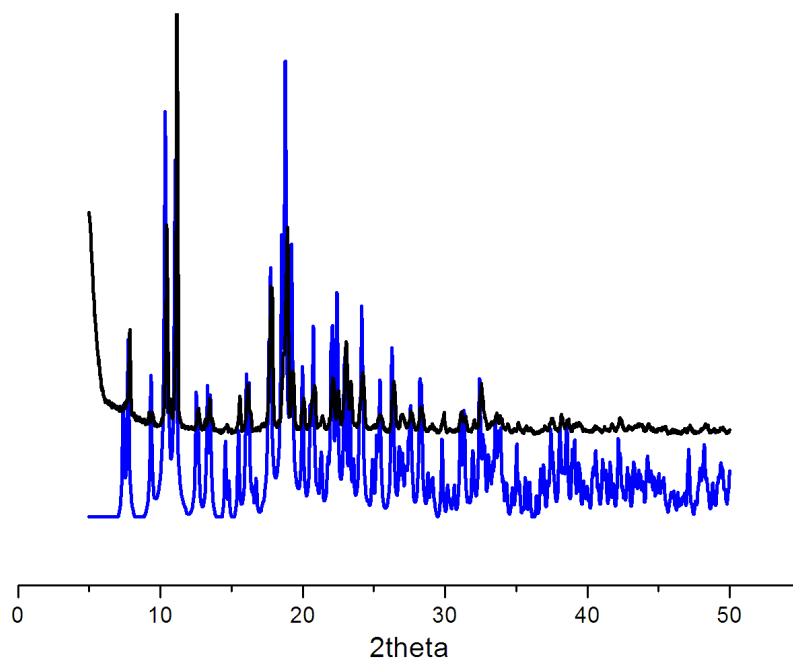

**Fig. S4.** The simulated (blue) and experimental (black) XRPD patterns for **2**.

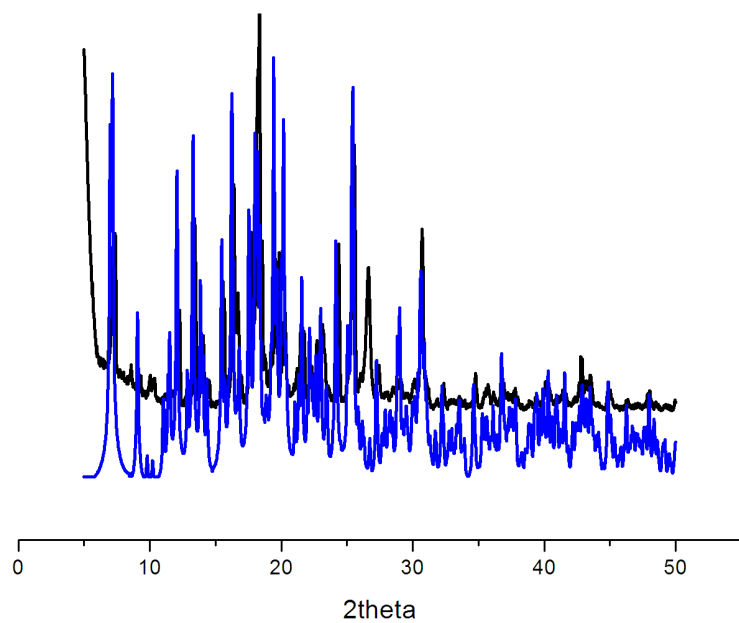

**Fig. S5.** The simulated (blue) and experimental (black) XRPD patterns for **3**.

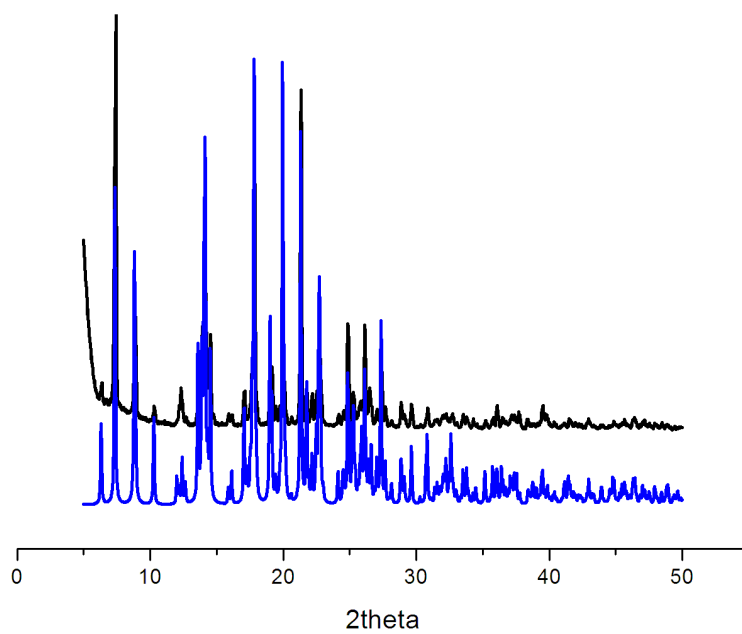

**Fig. S6.** The simulated (blue) and experimental (black) XRPD patterns for **4**.

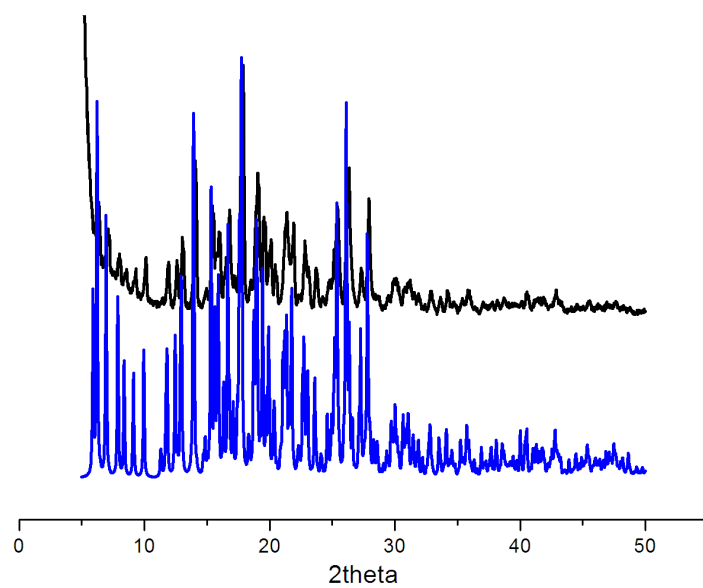

**Fig. S7.** The simulated (blue) and experimental (black) XRPD patterns for **5**.

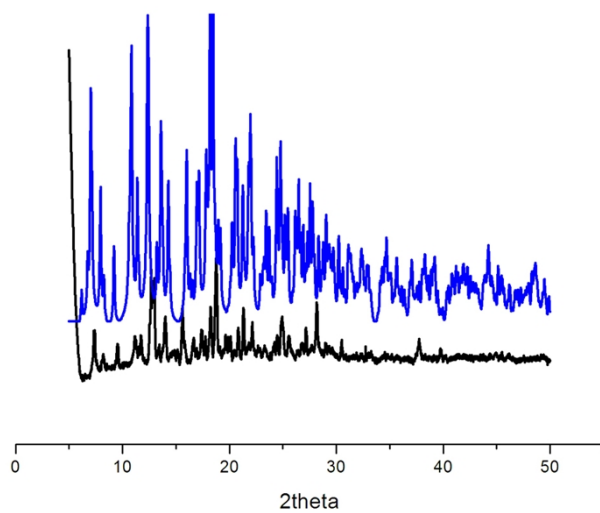

**Fig. S8.** The simulated (blue) and experimental (black) XRPD patterns for **6**.

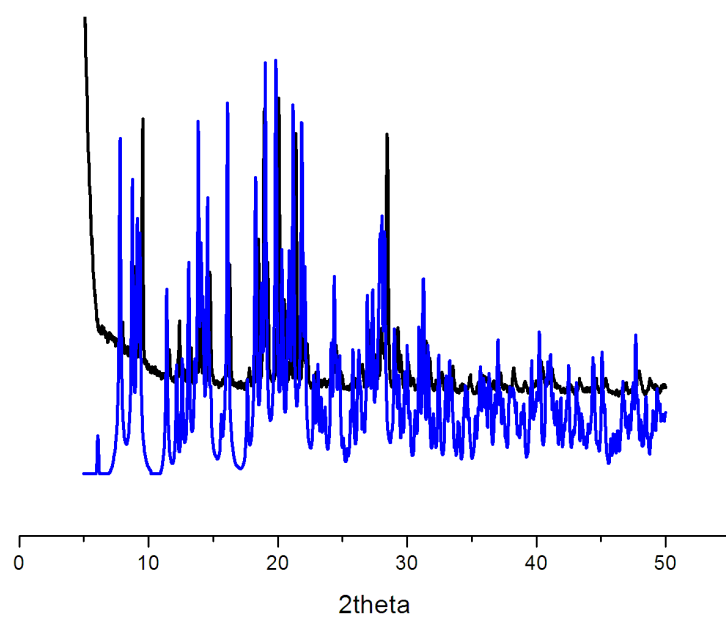

**Fig. S9.** The simulated (blue) and experimental (black) XRPD patterns for **7**.

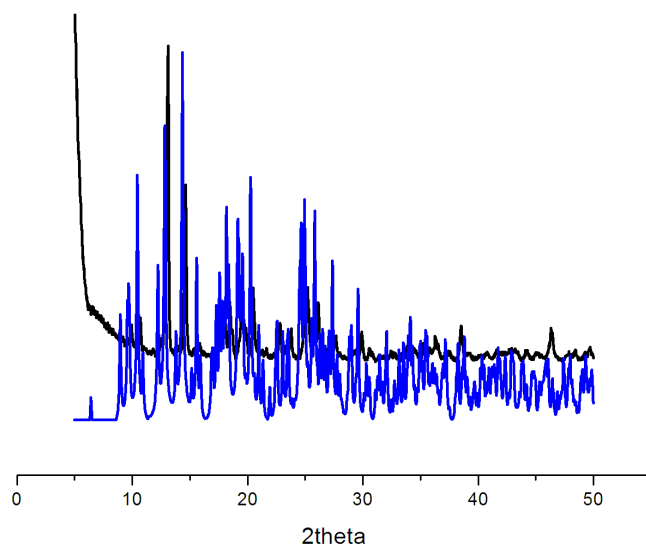

**Fig. S10.** The simulated (blue) and experimental (black) XRPD patterns for **8**.

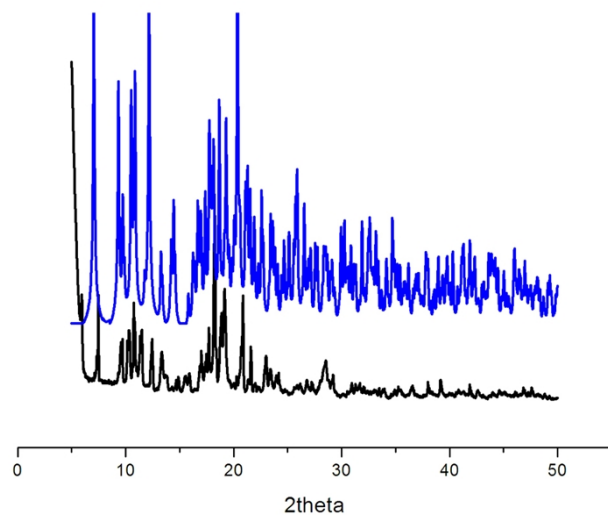

**Fig. S11.** The simulated (blue) and experimental (black) XRPD patterns for **9**.

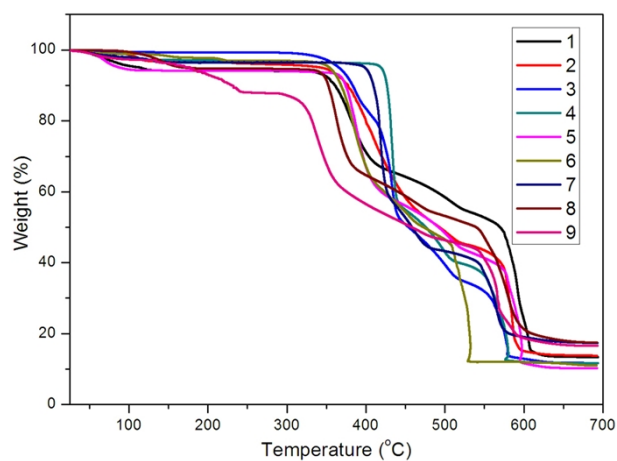

**Fig. S12.** TGA curves of **1-9**.

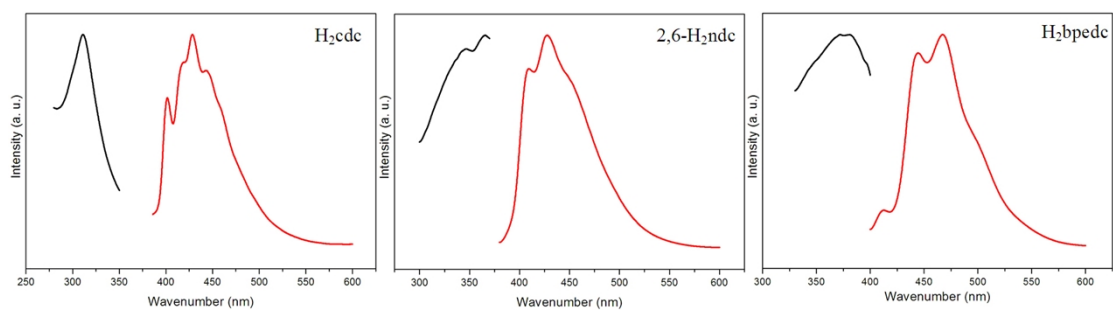

**Fig. S13.** Excitation (black) and emission (red) spectra of  $H_2cdc$ ,  $2,6-H_2ndc$  and  $H_2bpedc$ .

**Table S1.** Selected bond distances (Å) and angles (°) for **1**.

---

|                     |            |
|---------------------|------------|
| Zn(1)-N(1)          | 2.038(3)   |
| Zn(1)-N(4)#2        | 2.005(3)   |
| Zn(1)-O(1)          | 1.988(2)   |
| Zn(1)-O(4)#1        | 1.951(2)   |
| O(4)#1-Zn(1)-O(1)   | 101.74(11) |
| O(4)#1-Zn(1)-N(4)#2 | 118.24(12) |
| O(1)-Zn(1)-N(4)#2   | 110.72(11) |
| O(4)#1-Zn(1)-N(1)   | 102.57(11) |
| O(1)-Zn(1)-N(1)     | 107.59(11) |
| N(4)#2-Zn(1)-N(1)   | 114.71(12) |

---

Symmetry transformations used to generate equivalent atoms: #1  $x, y, z-1$ ; #2  $x+3/2, -y+1/2, z+1/2$ .



**Table S2.** Selected bond distances (Å) and angles (°) for **2**.

---

|                   |            |
|-------------------|------------|
| Zn(1)-N(1)        | 2.0119(19) |
| Zn(1) - O(2)      | 1.9308(17) |
| Zn(1) - O(3)      | 1.9477(19) |
| Zn(1)-N(4)#1      | 2.0521(19) |
| O(2)-Zn(1)-O(3)   | 115.10(10) |
| O(2)-Zn(1)-N(1)   | 124.04(8)  |
| O(3)-Zn(1)-N(1)   | 111.41(9)  |
| O(2)-Zn(1)-N(4)#1 | 96.38(8)   |
| O(3)-Zn(1)-N(4)#1 | 100.44(9)  |
| N(1)-Zn(1)-N(4)#1 | 104.17(8)  |

---

Symmetry transformations used to generate equivalent atoms: #1 x,y-1,z-1

**Table S3.** Selected bond distances (Å) and angles (°) for **3**.

---

|                   |            |
|-------------------|------------|
| Zn(1)-N(1)        | 2.072(2)   |
| Zn(1)-O(1)        | 1.944(2)   |
| Zn(1)-O(3)        | 2.108(2)   |
| Zn(1)-O(4)        | 2.267(2)   |
| Zn(1)-N(4)#1      | 2.032(2)   |
| O(1)-Zn(1)-N(4)#1 | 124.13(10) |
| O(1)-Zn(1)-N(1)   | 108.51(9)  |
| N(4)#1-Zn(1)-N(1) | 96.44(9)   |
| O(1)-Zn(1)-O(3)   | 120.60(9)  |
| N(4)#1-Zn(1)-O(3) | 105.98(9)  |
| N(1)-Zn(1)-O(3)   | 93.92(9)   |
| O(1)-Zn(1)-O(4)   | 88.26(9)   |
| N(4)#1-Zn(1)-O(4) | 90.35(10)  |
| N(1)-Zn(1)-O(4)   | 153.50(9)  |
| O(3)-Zn(1)-O(4)   | 59.61(8)   |

---

Symmetry transformations used to generate equivalent atoms: #1  $x-1, y, z-1$

**Table S4.** Selected bond distances (Å) and angles (°) for **4**.

---

|                     |            |
|---------------------|------------|
| Zn(1)-N(1)          | 2.031(2)   |
| Zn(1)-O(1)          | 1.956(2)   |
| Zn(1)-O(5)#1        | 1.971(2)   |
| Zn(1)-N(4)#2        | 2.049(2)   |
| O(1)-Zn(1)-O(5)#1   | 109.20(9)  |
| O(1)-Zn(1)-N(1)     | 122.29(9)  |
| O(5)#1-Zn(1)-N(1)   | 97.71(9)   |
| O(1)-Zn(1)-N(4)#2   | 107.38(9)  |
| O(5)#1-Zn(1)-N(4)#2 | 121.04(10) |
| N(1)-Zn(1)-N(4)#2   | 99.89(9)   |

---

Symmetry transformations used to generate equivalent atoms: #1  $x+1/2, y-1/2, z$ ;  
#2  $x+1/2, -y+1/2, z+1/2$

**Table S5.** Selected bond distances (Å) and angles (°) for **5**.

---

|                      |            |
|----------------------|------------|
| Zn(1)-N(1)           | 2.023(3)   |
| Zn(1)-N(4)#1         | 2.040(3)   |
| Zn(1)-O(2)           | 1.958(2)   |
| Zn(1)-O(11)#2        | 2.054(3)   |
| Zn(2)-O(6)           | 1.969(3)   |
| Zn(2)-O(7)           | 1.985(2)   |
| Zn(2)-N(5)           | 2.004(3)   |
| Zn(2)-N(8)#3         | 2.038(3)   |
| O(2)-Zn(1)-N(1)      | 111.88(12) |
| O(2)-Zn(1)-N(4)#1    | 116.26(11) |
| N(1)-Zn(1)-N(4)#1    | 100.29(12) |
| O(2)-Zn(1)-O(11)#2   | 107.71(11) |
| N(1)-Zn(1)-O(11)#2   | 126.29(12) |
| N(4)#1-Zn(1)-O(11)#2 | 93.03(12)  |
| O(6)-Zn(2)-O(7)      | 99.03(11)  |
| O(6)-Zn(2)-N(5)      | 128.20(14) |
| O(7)-Zn(2)-N(5)      | 111.07(11) |
| O(6)-Zn(2)-N(8)#3    | 98.70(14)  |
| O(7)-Zn(2)-N(8)#3    | 112.39(11) |
| N(5)-Zn(2)-N(8)#3    | 106.78(12) |

---

Symmetry transformations used to generate equivalent atoms: #1  $x, y-1, z$ ; #2  $x, y-1, z+1$ ; #3  $x, y, z+1$ .

**Table S6.** Selected bond distances (Å) and angles (°) for **6**.

---

|                      |            |
|----------------------|------------|
| Co(1)-N(5)           | 2.165(3)   |
| Co(1)-N(8)#4         | 2.137(3)   |
| Co(1)-O(2)           | 2.093(2)   |
| Co(1)-OW1            | 2.156(2)   |
| Co(1)-O(10)#3        | 2.069(2)   |
| Co(1)-O(4)#1         | 2.085(2)   |
| Co(2) - N(1)         | 2.127(3)   |
| Co(2)-N(4)#2         | 2.177(3)   |
| Co(2)-O(3)           | 2.079(2)   |
| Co(2)-O(7)           | 2.105(3)   |
| Co(2)-O(9)#4         | 2.040(2)   |
| Co(2)-OW1#2          | 2.146(2)   |
| O(10)#3-Co(1)-O(4)#1 | 95.70(10)  |
| O(10)#3-Co(1)-O(2)   | 86.76(10)  |
| O(4)#1-Co(1)-O(2)    | 176.27(10) |
| O(10)#3-Co(1)-N(8)#4 | 91.07(10)  |
| O(4)#1-Co(1)-N(8)#4  | 97.45(10)  |
| O(2)-Co(1)-N(8)#4    | 85.28(10)  |
| O(10)#3-Co(1)-OW1    | 90.66(9)   |
| O(4)#1-Co(1)-OW1     | 90.06(9)   |
| O(2)-Co(1)-OW1       | 87.10(9)   |
| N(8)#4-Co(1)-OW1     | 172.08(9)  |
| O(10)#3-Co(1)-N(5)   | 174.69(10) |
| O(4)#1-Co(1)-N(5)    | 89.46(10)  |
| O(2)-Co(1)-N(5)      | 88.02(10)  |

|                     |            |
|---------------------|------------|
| N(8)#4-Co(1)-N(5)   | 89.50(11)  |
| OW1-Co(1)-N(5)      | 88.07(10)  |
| O(9)#4-Co(2)-O(3)   | 94.45(11)  |
| O(9)#4-Co(2)-O(7)   | 179.17(11) |
| O(3)-Co(2)-O(7)     | 86.36(12)  |
| O(9)#4-Co(2)-N(1)   | 94.20(10)  |
| O(3)-Co(2)-N(1)     | 92.29(10)  |
| O(7)-Co(2)-N(1)     | 85.62(10)  |
| O(9)#4-Co(2)-OW1#2  | 91.46(9)   |
| O(3)-Co(2)-OW1#2    | 89.95(9)   |
| O(7)-Co(2)-OW1#2    | 88.69(9)   |
| N(1)-Co(2)-OW1#2    | 173.74(10) |
| O(9)#4-Co(2)-N(4)#2 | 89.17(10)  |
| O(3)-Co(2)-N(4)#2   | 174.59(11) |
| O(7)-Co(2)-N(4)#2   | 90.03(11)  |
| N(1)-Co(2)-N(4)#2   | 91.45(10)  |
| OW1#2-Co(2)-N(4)#2  | 85.93(9)   |

---

Symmetry transformations used to generate equivalent atoms: #1  $x,y,z-1$ ; #2  $x,y,z+1$ ; #3  $x,y+1,z-1$ ; #4  $x,y+1,z$ .

**Table S7.** Selected bond distances (Å) and angles (°) for **7**.

---

|              |           |
|--------------|-----------|
| Cd(1)-N(1)   | 2.230(3)  |
| Cd(1)-N(4)#1 | 2.256(3)  |
| Cd(1)-O(4)   | 2.162(3)  |
| Cd(1)-O(5)   | 2.255(10) |
| Cd(1)-O(5')  | 2.246(6)  |

|                    |            |
|--------------------|------------|
| O(4)-Cd(1)-N(1)    | 105.14(12) |
| O(4)-Cd(1)-O(5')   | 85.24(18)  |
| N(1)-Cd(1)-O(5')   | 118.56(18) |
| O(4)-Cd(1)-O(5)    | 83.4(3)    |
| N(1)-Cd(1)-O(5)    | 142.2(3)   |
| O(4)-Cd(1)-N(4)#1  | 124.41(11) |
| N(1)-Cd(1)-N(4)#1  | 100.99(11) |
| O(5')-Cd(1)-N(4)#1 | 122.44(17) |
| O(5)-Cd(1)-N(4)#1  | 103.9(3)   |

---

Symmetry transformations used to generate equivalent atoms: #1  $x+1/2, -y+1/2, z+1/2$ .

**Table S8.** Selected bond distances (Å) and angles (°) for **8**.

---

|                   |            |
|-------------------|------------|
| Cd(1)-N(1)        | 2.344(4)   |
| Cd(1)-N(4)#1      | 2.294(5)   |
| Cd(1)-O(2)        | 2.301(4)   |
| Cd(1)-O(3)        | 2.457(4)   |
| Cd(1)-O(4)        | 2.287(4)   |
| Cd(1)-OW1         | 2.300(4)   |
| O(4)-Cd(1)-N(4)#1 | 141.35(15) |
| O(4)-Cd(1)-O(2)   | 96.70(16)  |
| N(4)#1-Cd(1)-O(2) | 90.91(16)  |
| O(4)-Cd(1)-OW1    | 104.45(15) |
| N(4)#1-Cd(1)-OW1  | 114.14(16) |
| O(2)-Cd(1)-OW1    | 81.71(14)  |
| O(4)-Cd(1)-N(1)   | 87.06(16)  |

|                   |            |
|-------------------|------------|
| N(4)#1-Cd(1)-N(1) | 92.61(17)  |
| O(2)-Cd(1)-N(1)   | 168.94(15) |
| OW1-Cd(1)-N(1)    | 87.28(15)  |
| O(4)-Cd(1)-O(3)   | 55.16(13)  |
| N(4)#1-Cd(1)-O(3) | 87.08(15)  |
| O(2)-Cd(1)-O(3)   | 90.39(15)  |
| OW1-Cd(1)-O(3)    | 157.30(15) |

---

Symmetry transformations used to generate equivalent atoms: #1 x,-y,z-1/2.

**Table S9.** Selected bond distances (Å) and angles (°) for **9**.

---

|                     |            |
|---------------------|------------|
| Cd(1)-N(1)          | 2.266(3)   |
| Cd(1)-N(4)#1        | 2.251(3)   |
| Cd(1)-O(1)          | 2.522(3)   |
| Cd(1)-O(2)          | 2.259(3)   |
| Cd(1)-O(3)#2        | 2.350(3)   |
| Cd(1)-O(4)#2        | 2.351(3)   |
| N(4)#1-Cd(1)-O(2)   | 103.73(12) |
| N(4)#1-Cd(1)-N(1)   | 98.04(10)  |
| O(2)-Cd(1)-N(1)     | 132.39(12) |
| N(4)#1-Cd(1)-O(3)#2 | 89.70(10)  |
| O(2)-Cd(1)-O(3)#2   | 115.03(13) |
| N(1)-Cd(1)-O(3)#2   | 106.79(11) |
| N(4)#1-Cd(1)-O(4)#2 | 144.50(10) |
| O(2)-Cd(1)-O(4)#2   | 91.99(13)  |
| N(1)-Cd(1)-O(4)#2   | 94.12(12)  |



|                     |            |
|---------------------|------------|
| O(3)#2-Cd(1)-O(4)#2 | 54.82(9)   |
| N(4)#1-Cd(1)-O(1)   | 89.05(11)  |
| O(2)-Cd(1)-O(1)     | 53.92(12)  |
| N(1)-Cd(1)-O(1)     | 85.15(9)   |
| O(3)#2-Cd(1)-O(1)   | 168.05(11) |
| O(4)#2-Cd(1)-O(1)   | 125.27(11) |

---

Symmetry transformations used to generate equivalent atoms: #1  $x-1/2, -y+5/2, z-1/2$ ;  
#2  $x-1/2, -y+3/2, z+1/2$

**Table S10.** Specified hydrogen bonds of compound **2**

| D-H-A           | d(D···H)(Å) | d(H···A)(Å) | d(D···A)(Å) | (DHA)(deg) |
|-----------------|-------------|-------------|-------------|------------|
| OW1-HW1B-O(1)   | 0.90        | 1.87        | 2.760(3)    | 168.9      |
| OW1-HW1A-O(4)#1 | 0.87        | 1.95        | 2.815(4)    | 172.2      |

Symmetry codes: #1  $-x+2, -y, -z+2$

As shown in Table S10, in compound **2**, between the uncoordinated water molecules and carboxylate groups, there exist strong H-bonding (O···O distances range from 2.760(3) to 2.815(4) Å).
